# Supplementary material
Source: publisher figshare collection journal article supplement (https://acs.figshare.com/ndownloader/files/3984181)
Supplement: Supplementary file 1 [file 3984181]

## SUPPORTING INFORMATION

# Catalytic mechanism and allosteric regulation of UDP-glucose pyrophosphorylase from *Leishmania major*

*Jana Führling<sup>1</sup>, Johannes T. Cramer<sup>1</sup>, Françoise H. Routier<sup>1</sup>, Anne-Christin Lamerz<sup>1,†</sup>,  
Petra Baruch<sup>2</sup>, Rita Gerardy-Schahn<sup>1</sup> and Roman Fedorov<sup>2,3\*</sup>*

<sup>1</sup> Institute for Cellular Chemistry, OE4330, Hannover Medical School, Carl-Neuberg-  
Strasse 1, 30625 Hannover, Germany

<sup>2</sup> Research Division for Structural Analysis, OE8830, Hannover Medical School, Carl-  
Neuberg-Strasse 1, 30625 Hannover, Germany

<sup>3</sup> Institute for Biophysical Chemistry, OE4350, Hannover Medical School, Carl-Neuberg-  
Strasse 1, 30625 Hannover, Germany

### **Corresponding Author**

\* Roman Fedorov, Research Division for Structural Analysis, OE8830, Hannover Medical  
School, Carl-Neuberg-Strasse 1, 30625 Hannover, Germany

Phone: +49-5115323705; Fax: +49-5115325966; E-mail: Fedorov.Roman@mh-  
hannover.de

## TABLE OF CONTENTS

### TABLES

Supplementary Table S1. Crystallographic data and refinement statistics.....**S3**

Supplementary Table S2. Absolute QM/MM DFT (B3LYP5) energies computed for the LmUGP reagents, transition state and products geometries resulting from the IRC calculations.....**S4**

### FIGURES

Supplementary Figure S1 A.....**S5**

Supplementary Figure S1 B.....**S5**

Supplementary Figure S1 C.....**S6**

Supplementary Figure S1 D.....**S6**

Supplementary Figure S2 (A, B).....**S8**

Supplementary Figure S2 (C, D).....**S9**

Supplementary Figure S3.....**S10**

Supplementary Figure S4.....**S11**

## TABLES

**Supplementary Table S1. Crystallographic data and refinement statistics**

| Protein / Complex                                                  | LmUGP <sub>H191L</sub>            | LmUGP <sub>wt</sub> ·<br>dUpC <sub>pp</sub> | LmUGP <sub>L281D</sub> ·<br>UDP-Glc | LmUGP <sub>wt</sub> ·UDP-<br>Glc·Mg·SO <sub>4</sub> |
|--------------------------------------------------------------------|-----------------------------------|---------------------------------------------|-------------------------------------|-----------------------------------------------------|
| PDB-code                                                           | 4J18                              | 4M28                                        | 4M2B                                | 4M2A                                                |
| <i>Crystal parameters</i>                                          |                                   |                                             |                                     |                                                     |
| Group                                                              | $P4_3$                            | $C222_1$                                    | $C222_1$                            | $C222_1$                                            |
| Cell parameters:<br>a, b, c, [Å] $\alpha$ , $\beta$ , $\gamma$ [°] | 101.3, 101.3, 71.8,<br>90, 90, 90 | 72.3, 108.5, 152.6,<br>90, 90, 90           | 78.8, 86.9, 138.2,<br>90, 90, 90    | 79.8 89.1 136.5,<br>90, 90, 90                      |
| <i>Data collection</i>                                             |                                   |                                             |                                     |                                                     |
| Beamline                                                           | ID29, ESRF                        | ID23-2, ESRF                                | X11, DESY                           | X13, DESY                                           |
| Wavelength (Å)                                                     | 0.91985                           | 0.87260                                     | 0.816                               | 0.806                                               |
| Resolution limit (high-<br>resolution shell) (Å) *                 | 2.35 (2.4-2.35)                   | 3.0 (3.1-3.0)                               | 2.2 (2.25-2.2)                      | 1.66 (1.75-1.66)                                    |
| No. of observations /<br>unique reflections                        | 111527 / 30206                    | 126117 / 11151                              | 213348 / 24483                      | 1108570 / 57313                                     |
| Completeness<br>(total / high) %                                   | 99.2 / 98.2                       | 90.0 / 89.0                                 | 98.0 / 97.5                         | 99.7 / 97.9                                         |
| <I/ $\sigma$ (I)> (total / high)                                   | 9.8 / 2.4                         | 11.6 / 3.4                                  | 14.4 / 4.0                          | 28.8 / 8.8                                          |
| R <sub>sym</sub> (total / high) %                                  | 10.4 / 48.6                       | 8.0 / 40.7                                  | 7.6 / 27.1                          | 2.3 / 12.1                                          |
| <i>Refinement statistics</i>                                       |                                   |                                             |                                     |                                                     |
| Resolution range (Å)                                               | 19.5 – 2.35                       | 47.3 – 3.0                                  | 69.1 – 2.2                          | 68.3 – 1.66                                         |
| Included amino acids                                               | 4 - 488                           | 6 - 488                                     | 6 – 488                             | 6-488                                               |
| No. of protein atoms                                               | 4059                              | 3730                                        | 3730                                | 3730                                                |
| No. of waters                                                      | 418                               | 77                                          | 393                                 | 665                                                 |
| R <sub>work</sub> / R <sub>free</sub> %                            | 17.8 / 23.2                       | 21.3 / 27.9                                 | 17.5 / 24.2                         | 19.0 / 24.7                                         |
| r.m.s.d. bonds (Å) /<br>angles (deg)                               | 0.018 / 2.1                       | 0.009 / 1.2                                 | 0.007 / 1.4                         | 0.005 / 1.2                                         |

\*) High-resolution cutoffs were applied to resolution shells which had R<sub>sym</sub> ≥ 50% or had sustained high radiation damage.

***Supplementary Table S2. Absolute QM/MM DFT (B3LYP5) energies computed for the LmUGP reagents, transition state and products geometries resulting from the IRC calculations***

| Geometry along the reaction pathway of LmUGP | Electronic energy (a.u.) | Gibbs energy using harmonic normal mode approximation (kcal/mol) |
|----------------------------------------------|--------------------------|------------------------------------------------------------------|
| Reagents                                     | -3117.780642             | -1953475.781                                                     |
| Transition state                             | -3117.746956             | -1953455.003                                                     |
| Products                                     | -3117.777507             | -1953477.246                                                     |

## FIGURES

*Supplementary Figure S1 A*

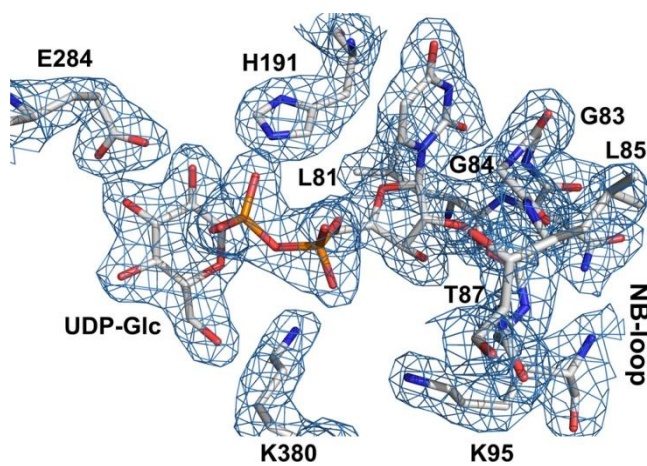

*Supplementary Figure S1 B*

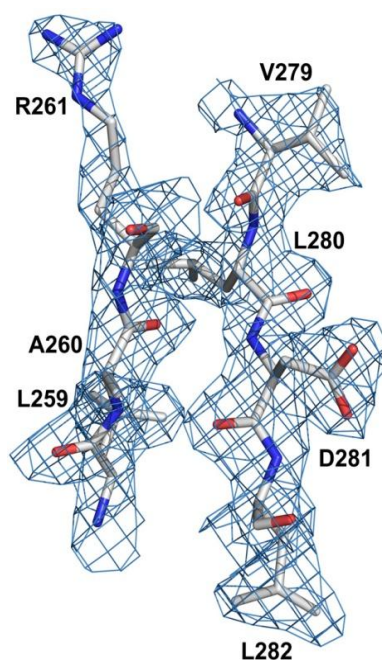

*Supplementary Figure S1 C*

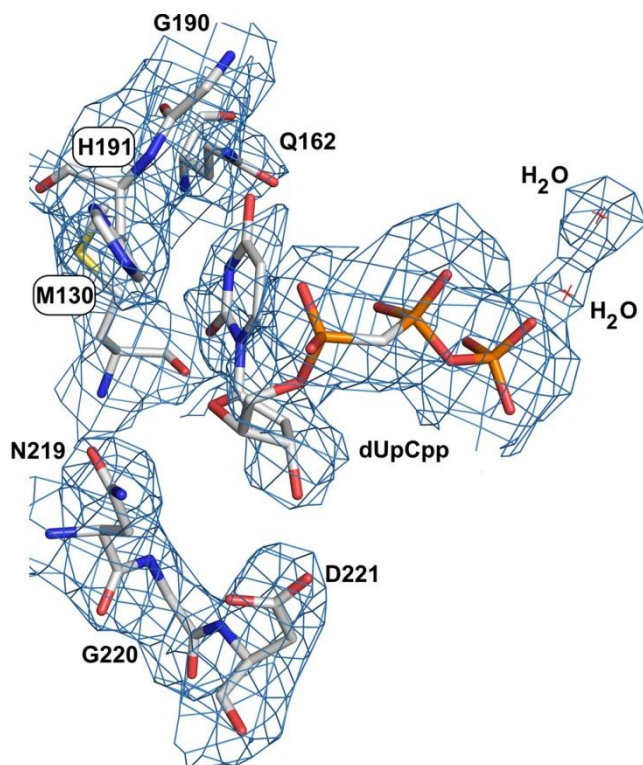

*Supplementary Figure S1 D*

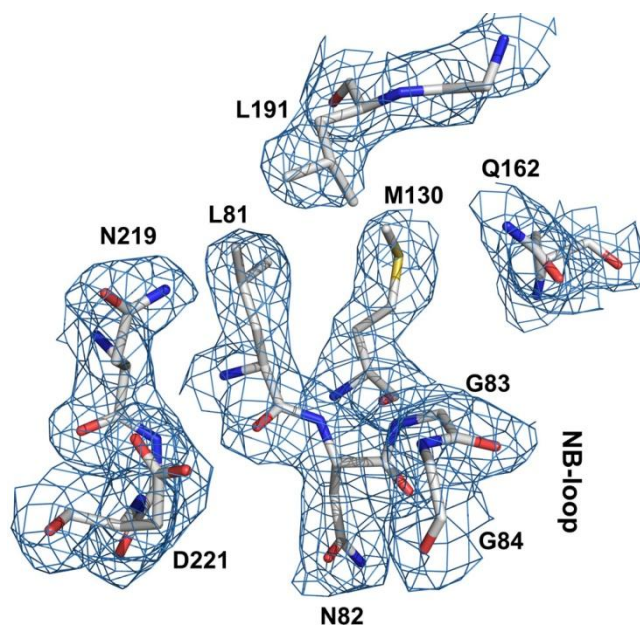

**Supplementary Figure S1.** Sections of the  $2F_{obs} - F_{calc}$  electron density omit maps contoured at  $1.0 \sigma$  showing the active site of the LmUGP<sub>L281D</sub> mutant in complex with UDP-Glc (A), the fraction of the handle region near mutation L281D (B), the UTP binding site in the structure of the LmUGP<sub>wt</sub>·dUpCpp complex (C), and the active site residues in the LmUGP<sub>H191L</sub> mutant structure (D). All maps were calculated using the final models of the complexes with substrates and ions omitted.

Supplementary Figure S2 (A, B)

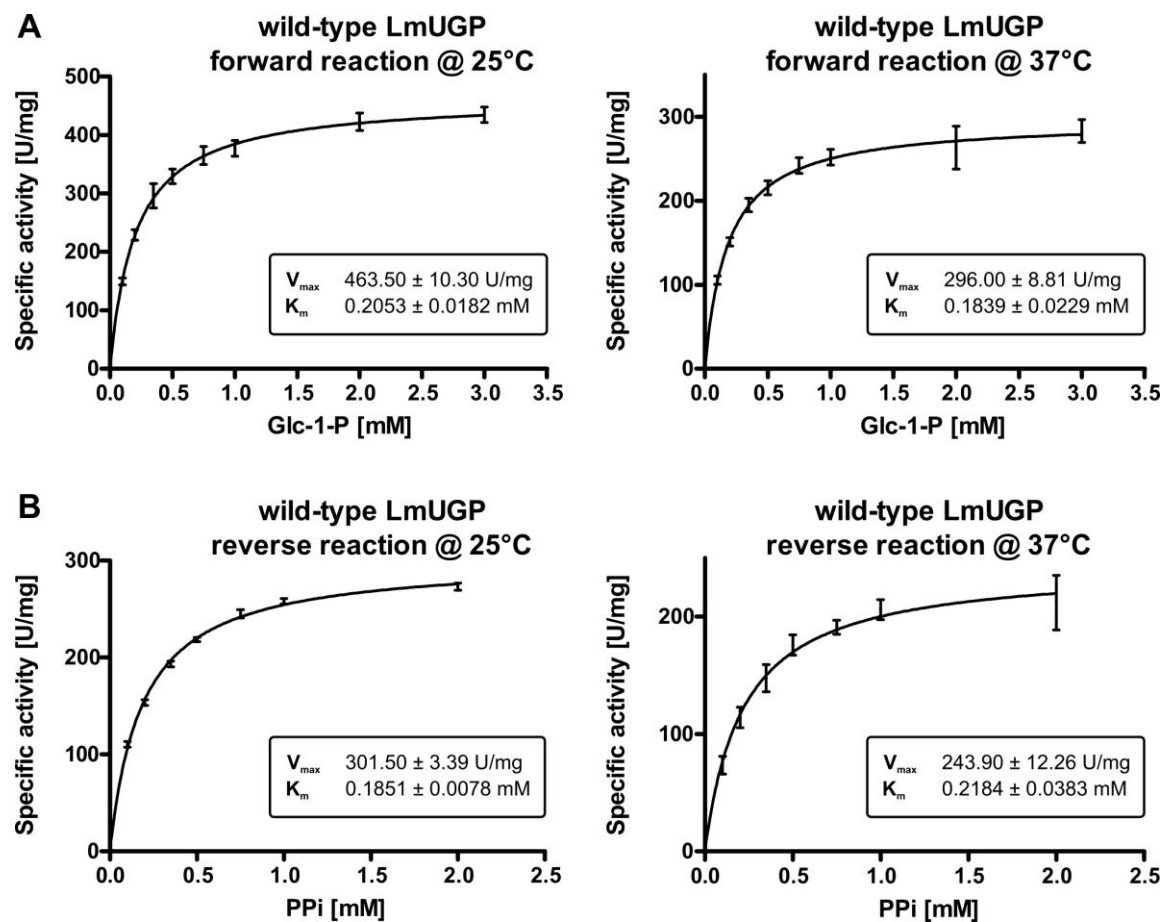



Supplementary Figure S2 (C, D)

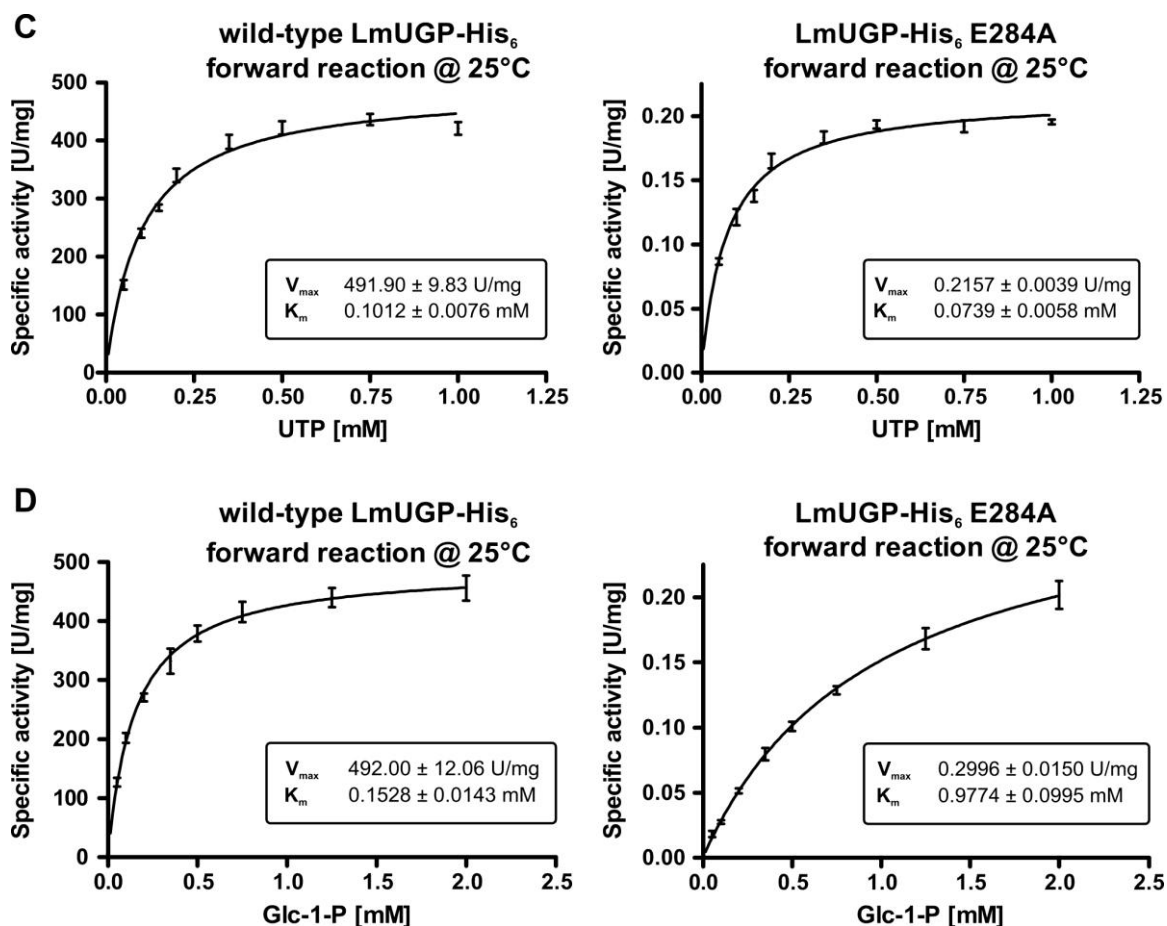

Supplementary Figure S2. Specific activities of wild-type and mutant *Leishmania major* UGP. *In vitro* specific activities, measured in U/mg (y-axis) of untagged and C-terminally His-tagged (LmUGP-His<sub>6</sub>) wild-type and mutant LmUGP, were determined in dependence of substrate concentration (x-axis) at different temperatures.  $V_{\max}$  and  $K_m$  values for the varied substrate, determined by nonlinear regression, are given as inlays. Plotting and calculation of kinetic parameters were performed using GraphPad Prism.

*Supplementary Figure S3*

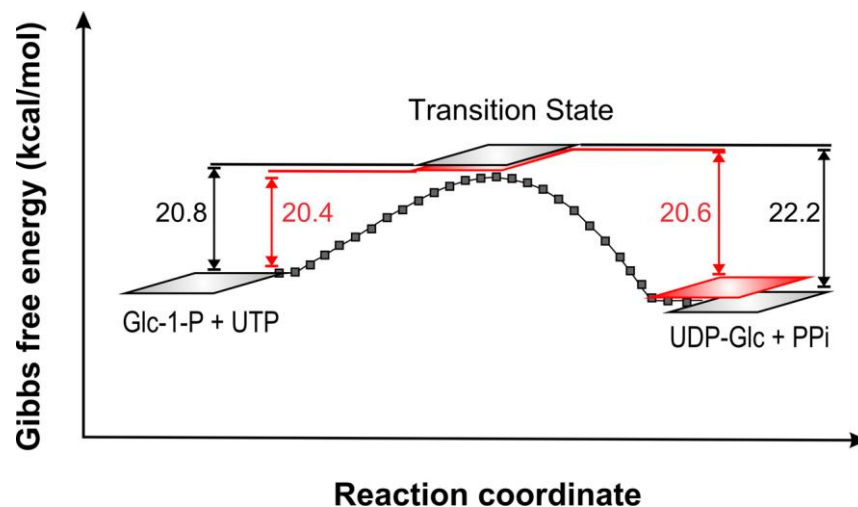

*Supplementary Figure S3.* Energy profile along the LmUGP reaction pathway. Energy barriers resulting from the quantum chemical calculations (black, **Supplementary Table S2**) are in a good agreement with the barriers derived from experimental kinetics data (red) at a physiological temperature (**Supplementary Fig. S2 A, B right**).

**Supplementary Figure S4**

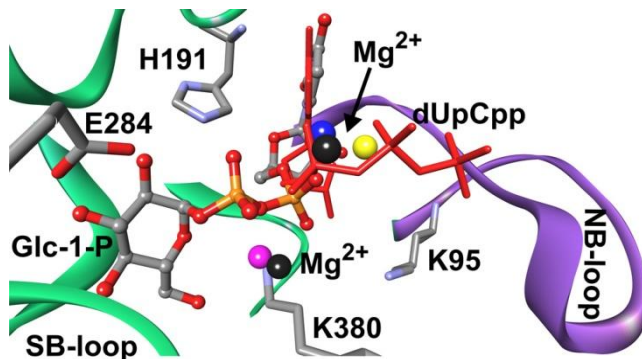

**Supplementary Figure S4.** Superposition of LmUGP in the post-reactive state (atom colors: blue, positive; red, negative; grey, neutral;  $\text{Mg}^{2+}$ , yellow) with LmUGP·dUpCpp complex (only the substrate is shown in red), GMP·GTP complex (pdb-code: 2X60; only  $\text{Mg}^{2+}$  is shown in blue), GMP·GDP-Man complex (pdb-code: 2X5Z; only  $\text{Mg}^{2+}$  is shown in magenta) and *C. glutamicum* UGP·UDP-Glc complex (pdb-code: 2PA4; only  $\text{Mg}^{2+}$  ions are shown in black). The catalytically important  $\text{Mg}^{2+}$  ions in GMP·GDP-Man and *C. glutamicum* UGP·UDP-Glc complexes occupy the same place as the amino group of K380 side chain in the active conformation of LmUGP.
